# Supplementary material for: Antiscalants Used in Seawater Desalination: Biodegradability and Effects on Microbial Diversity
Source: MDPI journal article supplement (doi:10.3390/microorganisms10081580), 2022-08-05
Supplement: s1 [file s1]

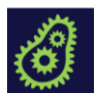

## Supplementary Materials

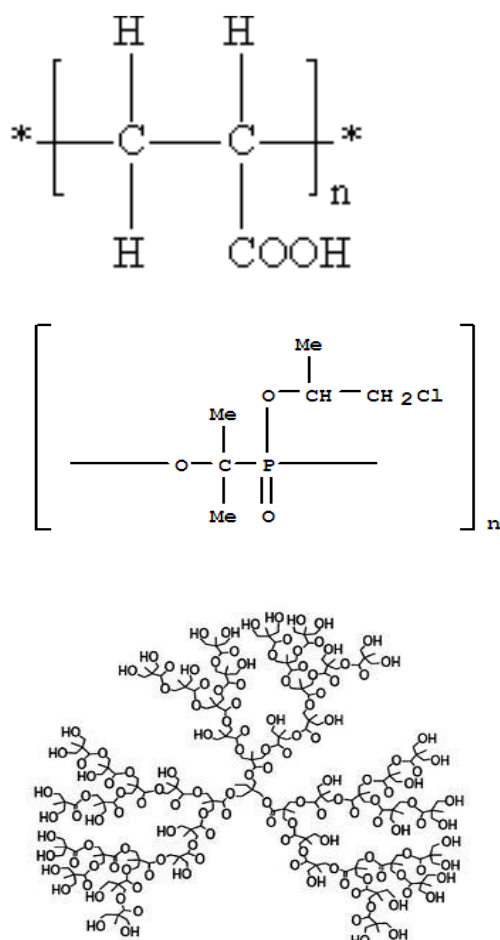

**Figure S1.** The active antiscalant polymers content in the commercial antiscalants used in this study, from top to bottom: Polyacrylic-acid; Polyphosphonate; and Carboxylated dendrimeric polymer.

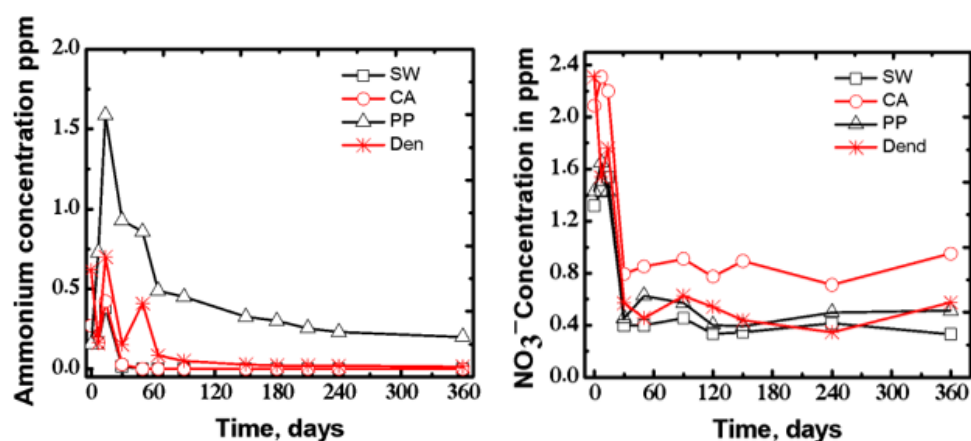

**Figure S2.** N-ammonium (right) and N-NO<sub>3</sub><sup>-</sup> (left) concentration of the incubated seawater in the presence and absence of 100 mg/L polyacrylic acid- (CA), polyphosphonate- (PP), and carboxylated dendrimeric- (Den) based antiscalants.

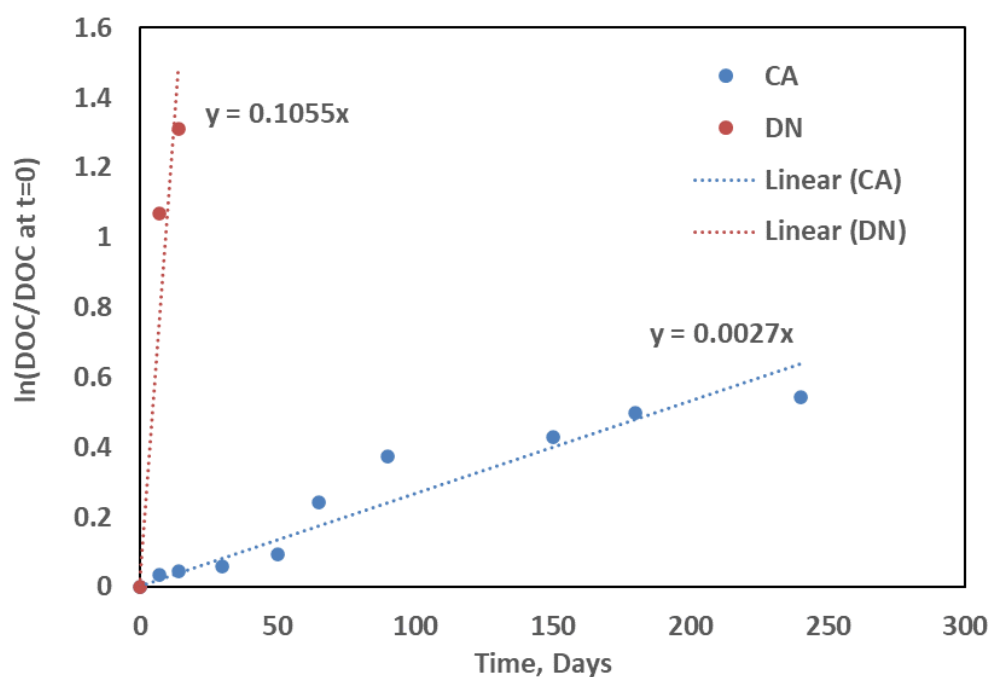

**Figure S3.** DOC degradation kinetics of 100 mg/L polyacrylic acid- (CA) and carboxylated dendritic- (DN) based antisclerants..

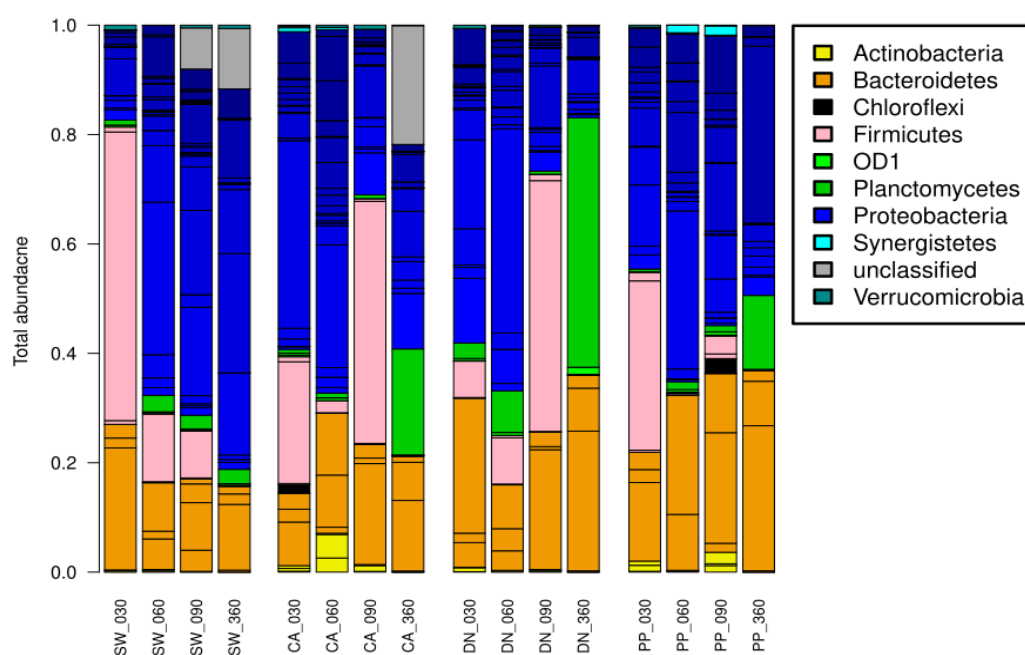

**Figure S4.** Phyla relative abundance in each treatment following different incubation periods. Shades of the same color represent the different bacterial order in each phylum.

**Table S1.** A number of high-quality sequences, Good's coverage, Chao1, and Shannon–Wiener Index for all studied treatment and different time points.

| Days    | Index     | SW    | CA     | PP     | Den    |
|---------|-----------|-------|--------|--------|--------|
| 30 days | Sequences | 6,628 | 10,184 | 11,187 | 21,150 |
|         | ESC       | 97.6  | 97.6   | 98.1   | 98.8   |
|         | Chao1     | 659   | 856    | 936    | 1065   |

|          |                |        |        |        |        |
|----------|----------------|--------|--------|--------|--------|
| 60 days  | Shannon–Wiener | 4.48   | 4.38   | 4.62   | 4.33   |
|          | Sequences      | 12,402 | 28,176 | 51,858 | 21,184 |
|          | ESC            | 98.1   | 98.6   | 98.9   | 98.7   |
|          | Chao1          | 957    | 1,939  | 2,413  | 1,217  |
| 90 days  | Shannon–Wiener | 4.00   | 4.00   | 3.47   | 3.68   |
|          | Sequences      | 8,337  | 8,332  | 33,267 | 7,117  |
|          | ESC            | 97.7   | 97.3   | 98.8   | 95.4   |
|          | Chao1          | 814    | 1,704  | 1,722  | 829    |
| 360 days | Shannon–Wiener | 4.62   | 4.56   | 4.20   | 4.31   |
|          | Sequences      | 54,678 | 51,084 | 54,696 | 36,790 |
|          | ESC            | 98.8   | 98.9   | 98.7   | 98.1   |
|          | Chao1          | 750    | 1,514  | 1,502  | 730    |
|          | Shannon–Wiener | 4.72   | 4.21   | 4.31   | 4.55   |

Table S2. adonis significance based on Bray–Curtis distance matrix.

| Df                             | SumsOfSqs | MeanSqs  | F.Model | R2      |
|--------------------------------|-----------|----------|---------|---------|
| Pr(>F)                         |           |          |         |         |
| map\$antiscalant               |           | 3        | 0.4560  |         |
| 0.15202                        |           | 0.6855   |         | 0.11877 |
| 0.754                          |           |          |         |         |
| map\$day                       |           |          | 1       | 1.2287  |
|                                | 1.22870   |          | 5.5411  |         |
| 0.31999                        |           | 0.001 ** |         |         |
| map\$antiscal-<br>ant:map\$day | 3         | 0.3811   |         | 0.12704 |
|                                | 0.5729    |          | 0.09925 |         |
| 0.934                          |           |          |         |         |
| Residuals                      |           |          | 8       | 1.7739  |
|                                | 0.22174   |          |         |         |
| 0.46199                        |           |          |         |         |
| Total                          |           |          |         | 15      |
| 3.8398                         |           |          |         |         |
| 1.00000                        |           |          |         |         |

Table S3. ANOVA analysis of Adjusted R2 for RDA analysis showing different variables and chemical analysis significance and percent of the variation.

| DF       | Variance | F           | Pr(>F)      |           |          |
|----------|----------|-------------|-------------|-----------|----------|
| Day      |          | 3           | 0.049184115 | 4.9018000 | 0.009 ** |
| AS       |          | 3           | 0.012401975 | 0.9838548 | 0.429    |
| DOC      |          | 1           | 0.007890386 | 1.8778446 | 0.160    |
| TP       |          | 1           | 0.004889729 | 1.1637138 | 0.333    |
| PO4      |          | 1           | 0.006653914 | 1.5835748 | 0.242    |
| TDN      |          | 1           | 0.003962983 | 0.9431562 | 0.459    |
| NH4      |          | 1           | 0.003121739 | 0.7429473 | 0.567    |
| NO3      |          | 1           | 0.005428124 | 1.2918473 | 0.277    |
| Residual | 3        | 0.012605494 | NA          |           | NA       |
